# Supplementary material for: Ultra-Sensitive and Rapid Detection of Pathogenic Yersinia enterocolitica Based on the CRISPR/Cas12a Nucleic Acid Identification Platform
Source: MDPI journal article supplement (doi:10.3390/foods11142160), 2022-07-21
Supplement: s1 [file s1]

## Supplementary data

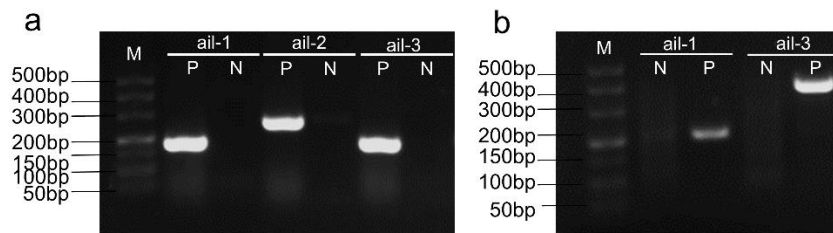

Figure S1 Primers screening (a) PCR amplification for *ail-1*, *ail-2* and *ail-3* screening; (b) RPA amplification for *ail-1* and *ail-3* screening.
